# Supplementary material
Source: HighWire-hosted journal article supplement (https://bmjopen.bmj.com/content/7/2/e013553)
Supplement: inline-supplementary-material-1 [file inline-supplementary-material-1.pdf]

## Appendix

### Non-respondent analyses: Lost to follow-up.

The analyses are run as a two-way table with measures of association (chi2).

| Time of data collection | 6-month follow-up |                  | Total            |
|-------------------------|-------------------|------------------|------------------|
|                         | Follow-up         | No follow        |                  |
| 2001                    | 1,300<br>3.80     | 250<br>2.07      | 1,550<br>3.35    |
| 2002-2003               | 5,906<br>17.25    | 1,238<br>10.27   | 7,144<br>15.43   |
| 2004-2005               | 6,774<br>19.79    | 1,725<br>14.31   | 8,499<br>18.36   |
| 2006-2007               | 6,049<br>17.67    | 2,114<br>17.54   | 8,163<br>17.64   |
| 2008-2009               | 6,514<br>19.03    | 2,208<br>18.32   | 8,722<br>18.84   |
| 2010-2011               | 4,458<br>13.02    | 2,121<br>17.60   | 6,579<br>14.21   |
| 2012-2013               | 3,234<br>9.45     | 2,396<br>19.88   | 5,630<br>12.16   |
| Total                   | 34,235<br>100.00  | 12,052<br>100.00 | 46,287<br>100.00 |

Pearson chi2(6) = 1.4e+03 Pr = 0.000

| Method/Type of intervention | 6-month follow-up |                  | Total            |
|-----------------------------|-------------------|------------------|------------------|
|                             | Follow-up         | No follow        |                  |
| GSP                         | 30,400<br>88.80   | 10,251<br>85.06  | 40,651<br>87.82  |
| Brief Intervention          | 71<br>0.21        | 69<br>0.57       | 140<br>0.30      |
| Speed courses               | 159<br>0.46       | 24<br>0.20       | 183<br>0.40      |
| Come and Quit               | 960<br>2.80       | 632<br>5.24      | 1,592<br>3.44    |
| Other                       | 2,645<br>7.73     | 1,076<br>8.93    | 3,721<br>8.04    |
| Total                       | 34,235<br>100.00  | 12,052<br>100.00 | 46,287<br>100.00 |

Pearson chi2(4) = 239.6633 Pr = 0.000

### Participants

| Sex    | 6-month follow-up |                  | Total            |
|--------|-------------------|------------------|------------------|
|        | Follow-up         | No follow        |                  |
| Male   | 13,280<br>38.79   | 4,691<br>38.92   | 17,971<br>38.83  |
| Female | 20,953<br>61.20   | 7,356<br>61.04   | 28,309<br>61.16  |
| .      | 2<br>0.01         | 5<br>0.04        | 7<br>0.02        |
| Total  | 34,235<br>100.00  | 12,052<br>100.00 | 46,287<br>100.00 |

Pearson chi2(2) = 7.5703 Pr = 0.023

| Age at the beginning of the course | 6-month follow-up |                  | Total            |
|------------------------------------|-------------------|------------------|------------------|
|                                    | Follow-up         | No follow        |                  |
| 15-24 years                        | 1,341<br>3.92     | 1,017<br>8.44    | 2,358<br>5.09    |
| 25-34 years                        | 4,069<br>11.89    | 1,816<br>15.07   | 5,885<br>12.71   |
| 35-44 years                        | 7,006<br>20.46    | 2,524<br>20.94   | 9,530<br>20.59   |
| 45-54 years                        | 9,324<br>27.24    | 2,986<br>24.78   | 12,310<br>26.59  |
| 55+ years                          | 12,426<br>36.30   | 3,661<br>30.38   | 16,087<br>34.75  |
| .                                  | 69<br>0.20        | 48<br>0.40       | 117<br>0.25      |
| Total                              | 34,235<br>100.00  | 12,052<br>100.00 | 46,287<br>100.00 |

Pearson chi2(5) = 553.5021 Pr = 0.000

| Education      | 6-month follow-up |                  | Total            |
|----------------|-------------------|------------------|------------------|
|                | Follow-up         | No follow        |                  |
| Low education  | 17,895<br>52.27   | 5,682<br>47.15   | 23,577<br>50.94  |
| High education | 15,131<br>44.20   | 5,855<br>48.58   | 20,986<br>45.34  |
| .              | 1,209<br>3.53     | 515<br>4.27      | 1,724<br>3.72    |
| Total          | 34,235<br>100.00  | 12,052<br>100.00 | 46,287<br>100.00 |

Pearson chi2(2) = 96.9182 Pr = 0.000

| Fagerström score | 6-month follow-up |                  | Total            |
|------------------|-------------------|------------------|------------------|
|                  | Follow-up         | No follow        |                  |
| 0-6 points       | 24,853<br>72.60   | 8,376<br>69.50   | 33,229<br>71.79  |
| 7-10 points      | 9,195<br>26.86    | 3,579<br>29.70   | 12,774<br>27.60  |
| .                | 187<br>0.55       | 97<br>0.80       | 284<br>0.61      |
| Total            | 34,235<br>100.00  | 12,052<br>100.00 | 46,287<br>100.00 |

Pearson chi2(2) = 47.6348 Pr = 0.000

| Job situation  | 6-month follow-up |                  | Total            |
|----------------|-------------------|------------------|------------------|
|                | Follow-up         | No follow        |                  |
| Not unemployed | 27,732<br>81.00   | 9,084<br>75.37   | 36,816<br>79.54  |
| Unemployed     | 5,715<br>16.69    | 2,585<br>21.45   | 8,300<br>17.93   |
| .              | 788<br>2.30       | 383<br>3.18      | 1,171<br>2.53    |
| Total          | 34,235<br>100.00  | 12,052<br>100.00 | 46,287<br>100.00 |

Pearson chi2(2) = 174.9989 Pr = 0.000

| Cigarettes per day    | 6-month follow-up |                  | Total            |
|-----------------------|-------------------|------------------|------------------|
|                       | Follow-up         | No follow        |                  |
| <20 cigarettes per da | 14,661<br>42.82   | 4,957<br>41.13   | 19,618<br>42.38  |
| ≥20 cigarettes per da | 19,178<br>56.02   | 6,977<br>57.89   | 26,155<br>56.51  |
| .                     | 396<br>1.16       | 118<br>0.98      | 514<br>1.11      |
| Total                 | 34,235<br>100.00  | 12,052<br>100.00 | 46,287<br>100.00 |

Pearson chi2(2) = 14.1003 Pr = 0.001

| Being disadvantaged | 6-month follow-up |                  | Total            |
|---------------------|-------------------|------------------|------------------|
|                     | Follow-up         | No follow        |                  |
| Not disadvantaged   | 12,717<br>37.15   | 4,742<br>39.35   | 17,459<br>37.72  |
| Disadvantaged       | 20,311<br>59.33   | 6,812<br>56.52   | 27,123<br>58.60  |
| .                   | 1,207<br>3.53     | 498<br>4.13      | 1,705<br>3.68    |
| Total               | 34,235<br>100.00  | 12,052<br>100.00 | 46,287<br>100.00 |

| Heavy smoker     | 6-month follow-up |                  | Total            |
|------------------|-------------------|------------------|------------------|
|                  | Follow-up         | No follow        |                  |
| Not heavy smoker | 8,184<br>23.91    | 3,082<br>25.57   | 11,266<br>24.34  |
| Heavy smoker     | 25,883<br>75.60   | 8,876<br>73.65   | 34,759<br>75.09  |
| .                | 168<br>0.49       | 94<br>0.78       | 262<br>0.57      |
| Total            | 34,235<br>100.00  | 12,052<br>100.00 | 46,287<br>100.00 |

Pearson chi2(2) = 27.8962 Pr = 0.000

| No. of pack years | 6-month follow-up |                  | Total            |
|-------------------|-------------------|------------------|------------------|
|                   | Follow-up         | No follow        |                  |
| <20 pack-years    | 10,991<br>32.10   | 4,626<br>38.38   | 15,617<br>33.74  |
| ≥20 pack-years    | 22,672<br>66.22   | 7,243<br>60.10   | 29,915<br>64.63  |
| .                 | 572<br>1.67       | 183<br>1.52      | 755<br>1.63      |
| Total             | 34,235<br>100.00  | 12,052<br>100.00 | 46,287<br>100.00 |

Pearson chi2(2) = 157.2072 Pr = 0.000

| Compliant with the programme | 6-month follow-up |                  | Total            |
|------------------------------|-------------------|------------------|------------------|
|                              | Follow-up         | No follow        |                  |
| No                           | 10,632<br>31.06   | 5,647<br>46.86   | 16,279<br>35.17  |
| Yes                          | 23,169<br>67.68   | 6,128<br>50.85   | 29,297<br>63.29  |
| .                            | 434<br>1.27       | 277<br>2.30      | 711<br>1.54      |
| Total                        | 34,235<br>100.00  | 12,052<br>100.00 | 46,287<br>100.00 |

Pearson chi2(2) = 1.1e+03 Pr = 0.000

| Living with a smoker | 6-month follow-up |                  | Total            |
|----------------------|-------------------|------------------|------------------|
|                      | Follow-up         | No follow        |                  |
| No                   | 21,680<br>63.33   | 7,776<br>64.52   | 29,456<br>63.64  |
| Yes                  | 12,197<br>35.63   | 4,121<br>34.19   | 16,318<br>35.25  |
| .                    | 358<br>1.05       | 155<br>1.29      | 513<br>1.11      |
| Total                | 34,235<br>100.00  | 12,052<br>100.00 | 46,287<br>100.00 |

Pearson chi2(2) = 11.8403 Pr = 0.003

| Living with others    | 6-month follow-up |                 | Total            |
|-----------------------|-------------------|-----------------|------------------|
|                       | Follow-up         | No follow       |                  |
| Living alone          | 6,964<br>34.37    | 3,242<br>36.68  | 10,206<br>35.07  |
| Living with children  | 6,226<br>30.73    | 2,638<br>29.85  | 8,864<br>30.46   |
| Living with adults (n | 6,853<br>33.82    | 2,867<br>32.44  | 9,720<br>33.40   |
| .                     | 220<br>1.09       | 92<br>1.04      | 312<br>1.07      |
| Total                 | 20,263<br>100.00  | 8,839<br>100.00 | 29,102<br>100.00 |

Pearson chi2(3) = 14.5823 Pr = 0.002

| Housing situation | 6-month follow-up |                 | Total            |
|-------------------|-------------------|-----------------|------------------|
|                   | Follow-up         | No follow       |                  |
| Owner             | 9,984<br>49.27    | 3,290<br>37.22  | 13,274<br>45.61  |
| Partly owned      | 1,689<br>8.34     | 812<br>9.19     | 2,501<br>8.59    |
| Rental            | 8,052<br>39.74    | 4,374<br>49.49  | 12,426<br>42.70  |
| Other             | 184<br>0.91       | 164<br>1.86     | 348<br>1.20      |
| .                 | 354<br>1.75       | 199<br>2.25     | 553<br>1.90      |
| Total             | 20,263<br>100.00  | 8,839<br>100.00 | 29,102<br>100.00 |

Pearson chi2(4) = 392.5174 Pr = 0.000

| Reccommended to quit by | 6-month follow-up |                  | Total            |
|-------------------------|-------------------|------------------|------------------|
|                         | Follow-up         | No follow        |                  |
| No                      | 13,821<br>40.37   | 4,808<br>39.89   | 18,629<br>40.25  |
| Yes, by health care p   | 15,870<br>46.36   | 6,049<br>50.19   | 21,919<br>47.35  |
| Yes, by others (not H   | 3,650<br>10.66    | 750<br>6.22      | 4,400<br>9.51    |
| .                       | 894<br>2.61       | 445<br>3.69      | 1,339<br>2.89    |
| Total                   | 34,235<br>100.00  | 12,052<br>100.00 | 46,287<br>100.00 |

Pearson chi2(3) = 248.9327 Pr = 0.000

| Earlier quit attempts | 6-month follow-up |                  | Total            |
|-----------------------|-------------------|------------------|------------------|
|                       | Follow-up         | No follow        |                  |
| None                  | 10,015<br>29.25   | 4,022<br>33.37   | 14,037<br>30.33  |
| 1-3 attempts          | 17,525<br>51.19   | 5,887<br>48.85   | 23,412<br>50.58  |
| > 3 attempts          | 4,780<br>13.96    | 1,516<br>12.58   | 6,296<br>13.60   |
| Yes unknown attempts  | 1,251<br>3.65     | 303<br>2.51      | 1,554<br>3.36    |
| .                     | 664<br>1.94       | 324<br>2.69      | 988<br>2.13      |
| Total                 | 34,235<br>100.00  | 12,052<br>100.00 | 46,287<br>100.00 |

Pearson chi2(4) = 130.0030 Pr = 0.000

### Smoking cessation clinic

| Place of the intervention | 6-month follow-up |                  | Total            |
|---------------------------|-------------------|------------------|------------------|
|                           | Follow-up         | No follow        |                  |
| Capital Region            | 11,122<br>32.49   | 4,536<br>37.64   | 15,658<br>33.83  |
| Central Denmark           | 8,157<br>23.83    | 2,613<br>21.68   | 10,770<br>23.27  |
| North Denmark             | 1,631<br>4.76     | 570<br>4.73      | 2,201<br>4.76    |
| Region Zealand            | 4,859<br>14.19    | 1,458<br>12.10   | 6,317<br>13.65   |
| South Denmark             | 8,466<br>24.73    | 2,875<br>23.85   | 11,341<br>24.50  |
| Total                     | 34,235<br>100.00  | 12,052<br>100.00 | 46,287<br>100.00 |

Pearson chi2(4) = 118.9975 Pr = 0.000

| Setting          | 6-month follow-up |                 | Total            |
|------------------|-------------------|-----------------|------------------|
|                  | Follow-up         | No follow       |                  |
| Citizen aimed    | 25,071<br>73.23   | 9,497<br>28.80  | 34,568<br>100.00 |
| Hospital/Midwife | 7,590<br>22.17    | 2,122<br>6.35   | 9,712<br>28.52   |
| Other            | 1,574<br>4.60     | 433<br>1.27     | 2,007<br>6.00    |
| Total            | 34,235<br>100.00  | 12,052<br>35.20 | 46,287<br>100.00 |

Pearson  $\chi^2(2) = 146.2297$  Pr = 0.000

| Free NRT or other supportive medication | 6-month follow-up |                 | Total            |
|-----------------------------------------|-------------------|-----------------|------------------|
|                                         | Follow-up         | No follow       |                  |
| No                                      | 13,319<br>38.90   | 5,168<br>14.84  | 18,487<br>53.74  |
| Free for days                           | 14,000<br>40.89   | 4,391<br>12.51  | 18,391<br>53.40  |
| Free for one week or more               | 4,426<br>12.93    | 1,636<br>4.73   | 6,062<br>17.63   |
| .                                       | 2,490<br>7.27     | 857<br>2.48     | 3,347<br>9.40    |
| Total                                   | 34,235<br>100.00  | 12,052<br>35.20 | 46,287<br>100.00 |

Pearson  $\chi^2(3) = 83.0809$  Pr = 0.000

### Smoking cessation intervention

| Format of the intervention | 6-month follow-up |                 | Total            |
|----------------------------|-------------------|-----------------|------------------|
|                            | Follow-up         | No follow       |                  |
| Individually               | 5,632<br>16.45    | 2,274<br>6.64   | 7,906<br>23.09   |
| Groups                     | 28,603<br>83.55   | 9,778<br>28.46  | 38,381<br>100.00 |
| Total                      | 34,235<br>100.00  | 12,052<br>35.20 | 46,287<br>100.00 |

Pearson  $\chi^2(1) = 36.7751$  Pr = 0.000

| User payment     | 6-month follow-up |                 | Total            |
|------------------|-------------------|-----------------|------------------|
|                  | Follow-up         | No follow       |                  |
| No user payment  | 30,664<br>89.57   | 11,107<br>32.23 | 41,771<br>100.00 |
| Yes user payment | 3,545<br>10.35    | 924<br>2.70     | 4,469<br>13.10   |
| .                | 26<br>0.08        | 21<br>0.06      | 47<br>0.14       |
| Total            | 34,235<br>100.00  | 12,052<br>35.20 | 46,287<br>100.00 |

Pearson  $\chi^2(2) = 81.8218$  Pr = 0.000

| Target audience   | 6-month follow-up |                 | Total            |
|-------------------|-------------------|-----------------|------------------|
|                   | Follow-up         | No follow       |                  |
| Patients          | 3,548<br>10.36    | 1,172<br>3.40   | 4,720<br>13.76   |
| Working place     | 8,101<br>23.66    | 2,732<br>7.99   | 10,833<br>31.65  |
| Ordinary citizens | 18,425<br>53.82   | 6,530<br>19.07  | 24,955<br>72.89  |
| Mixed             | 2,048<br>5.98     | 635<br>1.85     | 2,683<br>7.83    |
| Pregnant          | 995<br>2.91       | 251<br>0.73     | 1,246<br>3.64    |
| Other             | 1,111<br>3.25     | 723<br>2.11     | 1,834<br>5.36    |
| .                 | 7<br>0.02         | 9<br>0.03       | 16<br>0.05       |
| Total             | 34,235<br>100.00  | 12,052<br>35.20 | 46,287<br>100.00 |

Pearson  $\chi^2(6) = 216.0385$  Pr = 0.000

| Planned relapse prevention | 6-month follow-up |                | Total           |
|----------------------------|-------------------|----------------|-----------------|
|                            | Follow-up         | No follow      |                 |
| No                         | 10,312<br>30.15   | 5,002<br>14.69 | 15,314<br>44.84 |
| Yes                        | 9,951<br>29.07    | 3,837<br>11.03 | 13,788<br>39.13 |
| Total                      | 20,263<br>60.22   | 8,839<br>25.72 | 29,102<br>85.94 |

Pearson  $\chi^2(1) = 80.1838$  Pr = 0.000

*Non-respondent analyses: smokers not wanting to be contacted or who were intentionally not followed up versus those who were.*

The analyses are run as a two-way table with measures of association (chi2).

| Time of data collection | 6-month follow-up |                  | Total            |
|-------------------------|-------------------|------------------|------------------|
|                         | Followed          | Not follo        |                  |
| 2001                    | 1,576<br>3.38     | 1,024<br>2.86    | 2,600<br>3.16    |
| 2002-2003               | 7,239<br>15.54    | 4,436<br>12.39   | 11,675<br>14.17  |
| 2004-2005               | 8,682<br>18.63    | 9,445<br>26.39   | 18,127<br>22.00  |
| 2006-2007               | 8,163<br>17.52    | 6,935<br>19.37   | 15,098<br>18.33  |
| 2008-2009               | 8,722<br>18.72    | 5,207<br>14.55   | 13,929<br>16.91  |
| 2010-2011               | 6,579<br>14.12    | 4,503<br>12.58   | 11,082<br>13.45  |
| 2012-2013               | 5,630<br>12.08    | 4,246<br>11.86   | 9,876<br>11.99   |
| Total                   | 46,591<br>100.00  | 35,796<br>100.00 | 82,387<br>100.00 |

Pearson chi2(6) = 994.6432 Pr = 0.000

| Age at the beginning of the course | 6-month follow-up |                  | Total            |
|------------------------------------|-------------------|------------------|------------------|
|                                    | Followed          | Not follo        |                  |
| 15-24 years                        | 2,387<br>5.12     | 2,097<br>5.86    | 4,484<br>5.44    |
| 25-34 years                        | 5,945<br>12.76    | 4,429<br>12.37   | 10,374<br>12.59  |
| 35-44 years                        | 9,600<br>20.60    | 7,414<br>20.71   | 17,014<br>20.65  |
| 45-54 years                        | 12,386<br>26.58   | 9,653<br>26.97   | 22,039<br>26.75  |
| 55+ years                          | 16,147<br>34.66   | 12,026<br>33.60  | 28,173<br>34.20  |
| .                                  | 126<br>0.27       | 177<br>0.49      | 303<br>0.37      |
| Total                              | 46,591<br>100.00  | 35,796<br>100.00 | 82,387<br>100.00 |

Pearson chi2(5) = 58.0022 Pr = 0.000

| Method/Type of intervention | 6-month follow-up |                  | Total            |
|-----------------------------|-------------------|------------------|------------------|
|                             | Followed          | Not follo        |                  |
| GSP                         | 40,927<br>87.84   | 30,444<br>85.05  | 71,371<br>86.63  |
| Brief Intervention          | 140<br>0.30       | 100<br>0.28      | 240<br>0.29      |
| Speed courses               | 188<br>0.40       | 206<br>0.58      | 394<br>0.48      |
| Come and Quit               | 1,592<br>3.42     | 1,108<br>3.10    | 2,700<br>3.28    |
| Other                       | 3,744<br>8.04     | 3,938<br>11.00   | 7,682<br>9.32    |
| Total                       | 46,591<br>100.00  | 35,796<br>100.00 | 82,387<br>100.00 |

Pearson chi2(4) = 228.3708 Pr = 0.000

| Education      | 6-month follow-up |                  | Total            |
|----------------|-------------------|------------------|------------------|
|                | Followed          | Not follo        |                  |
| Low education  | 23,828<br>51.14   | 19,213<br>53.67  | 43,041<br>52.24  |
| High education | 21,029<br>45.14   | 15,006<br>41.92  | 36,035<br>43.74  |
| .              | 1,734<br>3.72     | 1,577<br>4.41    | 3,311<br>4.02    |
| Total          | 46,591<br>100.00  | 35,796<br>100.00 | 82,387<br>100.00 |

Pearson chi2(2) = 96.1876 Pr = 0.000

| Job situation  | 6-month follow-up |                  | Total            |
|----------------|-------------------|------------------|------------------|
|                | Followed          | Not follo        |                  |
| Not unemployed | 37,084<br>79.59   | 28,516<br>79.66  | 65,600<br>79.62  |
| Unemployed     | 8,328<br>17.87    | 6,247<br>17.45   | 14,575<br>17.69  |
| .              | 1,179<br>2.53     | 1,033<br>2.89    | 2,212<br>2.68    |
| Total          | 46,591<br>100.00  | 35,796<br>100.00 | 82,387<br>100.00 |

Pearson chi2(2) = 11.5754 Pr = 0.003

. tab2 b\_disadvantaged FollowUp06, chi2 column missing

## Participant

| Sex    | 6-month follow-up |                  | Total            |
|--------|-------------------|------------------|------------------|
|        | Followed          | Not follo        |                  |
| Male   | 18,098<br>38.84   | 14,054<br>39.26  | 32,152<br>39.03  |
| Female | 28,484<br>61.14   | 21,736<br>60.72  | 50,220<br>60.96  |
| .      | 9<br>0.02         | 6<br>0.02        | 15<br>0.02       |
| Total  | 46,591<br>100.00  | 35,796<br>100.00 | 82,387<br>100.00 |

Pearson chi2(2) = 1.5447 Pr = 0.462

| Being disadvantaged | 6-month follow-up |                  | Total            |
|---------------------|-------------------|------------------|------------------|
|                     | Followed          | Not follo        |                  |
| Not disadvantaged   | 17,496<br>37.55   | 12,596<br>35.19  | 30,092<br>36.53  |
| Disadvantaged       | 27,380<br>58.77   | 21,697<br>60.61  | 49,077<br>59.57  |
| .                   | 1,715<br>3.68     | 1,503<br>4.20    | 3,218<br>3.91    |
| Total               | 46,591<br>100.00  | 35,796<br>100.00 | 82,387<br>100.00 |

Pearson chi2(2) = 56.4533 Pr = 0.000

| No. of pack years | 6-month follow-up |                  | Total            |
|-------------------|-------------------|------------------|------------------|
|                   | Followed          | Not follo        |                  |
| <20 pack-years    | 15,761<br>33.83   | 11,945<br>33.37  | 27,706<br>33.63  |
| ≥20 pack-years    | 30,061<br>64.52   | 23,059<br>64.42  | 53,120<br>64.48  |
| .                 | 769<br>1.65       | 792<br>2.21      | 1,561<br>1.89    |
| Total             | 46,591<br>100.00  | 35,796<br>100.00 | 82,387<br>100.00 |

Pearson chi2(2) = 35.0457 Pr = 0.000

| Fagerström score | 6-month follow-up |                  | Total            |
|------------------|-------------------|------------------|------------------|
|                  | Followed          | Not follo        |                  |
| 0-6 points       | 33,462<br>71.82   | 25,547<br>71.37  | 59,009<br>71.62  |
| 7-10 points      | 12,840<br>27.56   | 9,909<br>27.68   | 22,749<br>27.61  |
| .                | 289<br>0.62       | 340<br>0.95      | 629<br>0.76      |
| Total            | 46,591<br>100.00  | 35,796<br>100.00 | 82,387<br>100.00 |

Pearson chi2(2) = 29.4824 Pr = 0.000

| Cigarettes per day    | 6-month follow-up |                  | Total            |
|-----------------------|-------------------|------------------|------------------|
|                       | Followed          | Not follo        |                  |
| <20 cigarettes per da | 19,768<br>42.43   | 14,980<br>41.85  | 34,748<br>42.18  |
| ≥20 cigarettes per da | 26,297<br>56.44   | 20,319<br>56.76  | 46,616<br>56.58  |
| .                     | 526<br>1.13       | 497<br>1.39      | 1,023<br>1.24    |
| Total                 | 46,591<br>100.00  | 35,796<br>100.00 | 82,387<br>100.00 |

Pearson chi2(2) = 12.9606 Pr = 0.002

| Heavy smoker     | 6-month follow-up |                  | Total            |
|------------------|-------------------|------------------|------------------|
|                  | Followed          | Not follo        |                  |
| Not heavy smoker | 11,377<br>24.42   | 8,629<br>24.11   | 20,006<br>24.28  |
| Heavy smoker     | 34,947<br>75.01   | 26,847<br>75.00  | 61,794<br>75.00  |
| .                | 267<br>0.57       | 320<br>0.89      | 587<br>0.71      |
| Total            | 46,591<br>100.00  | 35,796<br>100.00 | 82,387<br>100.00 |

Pearson chi2(2) = 30.0704 Pr = 0.000

| Compliant with the programme | 6-month follow-up |                  | Total            |
|------------------------------|-------------------|------------------|------------------|
|                              | Followed          | Not follo        |                  |
| No                           | 16,378<br>35.15   | 11,486<br>32.09  | 27,864<br>33.82  |
| Yes                          | 29,502<br>63.32   | 22,809<br>63.72  | 52,311<br>63.49  |
| .                            | 711<br>1.53       | 1,501<br>4.19    | 2,212<br>2.68    |
| Total                        | 46,591<br>100.00  | 35,796<br>100.00 | 82,387<br>100.00 |

Pearson chi2(2) = 593.0973 Pr = 0.000

| Living with a smoker | 6-month follow-up |                  | Total            |
|----------------------|-------------------|------------------|------------------|
|                      | Followed          | Not follo        |                  |
| No                   | 29,630<br>63.60   | 22,186<br>61.98  | 51,816<br>62.89  |
| Yes                  | 16,440<br>35.29   | 13,025<br>36.39  | 29,465<br>35.76  |
| .                    | 521<br>1.12       | 585<br>1.63      | 1,106<br>1.34    |
| Total                | 46,591<br>100.00  | 35,796<br>100.00 | 82,387<br>100.00 |

Pearson chi2(2) = 55.4289 Pr = 0.000

| Living with others    | 6-month follow-up |                  | Total            |
|-----------------------|-------------------|------------------|------------------|
|                       | Followed          | Not follo        |                  |
| Living alone          | 10,206<br>35.07   | 6,881<br>33.09   | 17,087<br>34.25  |
| Living with children  | 8,864<br>30.46    | 6,554<br>31.52   | 15,418<br>30.90  |
| Living with adults (n | 9,720<br>33.40    | 7,020<br>33.76   | 16,740<br>33.55  |
| .                     | 312<br>1.07       | 339<br>1.63      | 651<br>1.30      |
| Total                 | 29,102<br>100.00  | 20,794<br>100.00 | 49,896<br>100.00 |

Pearson chi2(3) = 47.7068 Pr = 0.000

| Housing situation | 6-month follow-up |                  | Total            |
|-------------------|-------------------|------------------|------------------|
|                   | Followed          | Not follo        |                  |
| Owner             | 13,274<br>45.61   | 10,235<br>49.22  | 23,509<br>47.12  |
| Partly owned      | 2,501<br>8.59     | 1,452<br>6.98    | 3,953<br>7.92    |
| Rental            | 12,426<br>42.70   | 8,298<br>39.91   | 20,724<br>41.53  |
| Other             | 348<br>1.20       | 253<br>1.22      | 601<br>1.20      |
| .                 | 553<br>1.90       | 556<br>2.67      | 1,109<br>2.22    |
| Total             | 29,102<br>100.00  | 20,794<br>100.00 | 49,896<br>100.00 |

Pearson chi2(4) = 128.7344 Pr = 0.000

| Recommended to quit by | 6-month follow-up |                  | Total            |
|------------------------|-------------------|------------------|------------------|
|                        | Followed          | Not follo        |                  |
| No                     | 18,813<br>40.38   | 14,449<br>40.36  | 33,262<br>40.37  |
| Yes, by health care p  | 21,967<br>47.15   | 16,548<br>46.23  | 38,515<br>46.75  |
| Yes, by others (not H  | 4,472<br>9.60     | 3,770<br>10.53   | 8,242<br>10.00   |
| .                      | 1,339<br>2.87     | 1,029<br>2.87    | 2,368<br>2.87    |
| Total                  | 46,591<br>100.00  | 35,796<br>100.00 | 82,387<br>100.00 |

Pearson chi2(3) = 21.2984 Pr = 0.000

| Earlier quit attempts | 6-month follow-up |                  | Total            |
|-----------------------|-------------------|------------------|------------------|
|                       | Followed          | Not follo        |                  |
| None                  | 14,114<br>30.29   | 10,603<br>29.62  | 24,717<br>30.00  |
| 1-3 attempts          | 23,539<br>50.52   | 17,963<br>50.18  | 41,502<br>50.37  |
| > 3 attempts          | 6,346<br>13.62    | 4,781<br>13.36   | 11,127<br>13.51  |
| Yes unknown attempts  | 1,587<br>3.41     | 1,536<br>4.29    | 3,123<br>3.79    |
| .                     | 1,005<br>2.16     | 913<br>2.55      | 1,918<br>2.33    |
| Total                 | 46,591<br>100.00  | 35,796<br>100.00 | 82,387<br>100.00 |

Pearson chi2(4) = 59.8356 Pr = 0.000

## Smoking cessation clinic

| Place of the intervention | 6-month follow-up |                  | Total            |
|---------------------------|-------------------|------------------|------------------|
|                           | Followed          | Not follo        |                  |
| Capital Region            | 15,729<br>33.76   | 9,102<br>25.43   | 24,831<br>30.14  |
| Central Denmark           | 10,868<br>23.33   | 8,183<br>22.86   | 19,051<br>23.12  |
| North Denmark             | 2,220<br>4.76     | 2,306<br>6.44    | 4,526<br>5.49    |
| Region Zealand            | 6,375<br>13.68    | 7,900<br>22.07   | 14,275<br>17.33  |
| South Denmark             | 11,399<br>24.47   | 8,305<br>23.20   | 19,704<br>23.92  |
| Total                     | 46,591<br>100.00  | 35,796<br>100.00 | 82,387<br>100.00 |

Pearson chi2(4) = 1.4e+03 Pr = 0.000

| Setting          | 6-month follow-up |                  | Total            |
|------------------|-------------------|------------------|------------------|
|                  | Followed          | Not follo        |                  |
| Citizen aimed    | 34,781<br>74.65   | 26,031<br>72.72  | 60,812<br>73.81  |
| Hospital/Midwife | 9,784<br>21.00    | 7,675<br>21.44   | 17,459<br>21.19  |
| Other            | 2,026<br>4.35     | 2,090<br>5.84    | 4,116<br>5.00    |
| Total            | 46,591<br>100.00  | 35,796<br>100.00 | 82,387<br>100.00 |

Pearson chi2(2) = 102.0653 Pr = 0.000

## Smoking cessation intervention

| Format of the intervention | 6-month follow-up |                  | Total            |
|----------------------------|-------------------|------------------|------------------|
|                            | Followed          | Not follo        |                  |
| Individually               | 7,936<br>17.03    | 7,171<br>20.03   | 15,107<br>18.34  |
| Groups                     | 38,655<br>82.97   | 28,625<br>79.97  | 67,280<br>81.66  |
| Total                      | 46,591<br>100.00  | 35,796<br>100.00 | 82,387<br>100.00 |

Pearson chi2(1) = 121.6374 Pr = 0.000

| Target audience   | 6-month follow-up |                  | Total            |
|-------------------|-------------------|------------------|------------------|
|                   | Followed          | Not follo        |                  |
| Patients          | 4,743<br>10.18    | 3,960<br>11.06   | 8,703<br>10.56   |
| Working place     | 10,963<br>23.53   | 7,841<br>21.90   | 18,804<br>22.82  |
| Ordinary citizens | 25,069<br>53.81   | 18,742<br>52.36  | 43,811<br>53.18  |
| Mixed             | 2,697<br>5.79     | 2,434<br>6.80    | 5,131<br>6.23    |
| Pregnant          | 1,255<br>2.69     | 1,103<br>3.08    | 2,358<br>2.86    |
| Other             | 1,848<br>3.97     | 1,702<br>4.75    | 3,550<br>4.31    |
| .                 | 16<br>0.03        | 14<br>0.04       | 30<br>0.04       |
| Total             | 46,591<br>100.00  | 35,796<br>100.00 | 82,387<br>100.00 |

Pearson chi2(6) = 119.5273 Pr = 0.000
